# Supplementary material
Source: PubMed Central journal article supplement (PMC3422830)
Supplement: amiajnl-2011-000752-s1.pdf [file amiajnl-2011-000752-s1.pdf]

## APPENDIX A: ADDITIONAL EXPERIMENTAL RESULTS

| System configuration   |              |           | Restricted dataset |        |                     |                   | Unrestricted dataset |        |                     |                   |
|------------------------|--------------|-----------|--------------------|--------|---------------------|-------------------|----------------------|--------|---------------------|-------------------|
| Feature set            | Test         | $uc_{th}$ | microP             | microR | microF <sub>1</sub> | maxF <sub>1</sub> | microP               | microR | microF <sub>1</sub> | maxF <sub>1</sub> |
| ngrams                 | $\chi^2$     |           | 76.98              | 61.36  | 68.29               | 77.33             | 69.88                | 58.65  | 63.78               | 73.68             |
|                        | $t$          |           | 56.19              | 72.98  | 63.49               | <b>80.95</b>      | 39.02                | 71.31  | 50.44               | 70.44             |
|                        | $\chi^2 + t$ |           | 77.53              | 65.07  | 70.76               | 80.00             | 62.40                | 64.01  | 63.19               | <b>75.63</b>      |
| concepts               | $\chi^2$     |           | 45.05              | 67.25  | 53.96               | <b>77.08</b>      | 45.85                | 68.28  | 54.86               | <b>73.17</b>      |
|                        | $t$          |           | 38.57              | 68.70  | 49.41               | 68.00             | 29.39                | 67.26  | 40.91               | 52.53             |
|                        | $\chi^2 + t$ |           | 45.03              | 67.46  | 54.01               | 75.27             | 40.11                | 67.06  | 50.19               | 72.59             |
| ngrams+assert          | $\chi^2$     |           | 81.11              | 62.88  | 70.84               | 80.00             | 77.40                | 60.55  | 67.95               | 76.03             |
|                        | $t$          |           | 69.44              | 74.58  | 71.92               | 83.15             | 62.15                | 77.22  | 68.87               | 74.07             |
|                        | $\chi^2 + t$ |           | 79.46              | 66.41  | 72.35               | <b>83.33</b>      | 71.81                | 67.90  | 69.80               | <b>77.78</b>      |
| concepts+assert        | $\chi^2$     |           | 67.76              | 69.57  | 68.65               | <b>79.57</b>      | 63.78                | 70.59  | 67.02               | <b>79.37</b>      |
|                        | $t$          |           | 61.66              | 71.34  | 66.15               | 74.47             | 54.85                | 75.96  | 63.70               | 68.83             |
|                        | $\chi^2 + t$ |           | 65.27              | 69.47  | 67.30               | 77.78             | 57.86                | 71.97  | 64.15               | 72.48             |
| ngrams+concepts        | $\chi^2$     | 50        | 77.39              | 65.40  | 70.89               | 81.93             | 67.33                | 64.09  | 65.67               | <b>80.33</b>      |
|                        | $\chi^2$     | 100       | 74.29              | 65.66  | 69.71               | 81.93             | 63.85                | 64.14  | 64.00               | 76.67             |
|                        | $\chi^2$     | 500       | 80.97              | 64.81  | 72.00               | 80.00             | 65.26                | 64.93  | 65.09               | 74.34             |
|                        | $\chi^2$     | 1000      | 78.35              | 65.49  | 71.34               | 78.38             | 84.74                | 59.82  | 70.13               | 76.11             |
|                        | $\chi^2$     | 5000      | 83.67              | 59.09  | 69.26               | 74.70             | 85.74                | 63.08  | 72.68               | <b>80.33</b>      |
|                        | $t$          | 50        | 54.82              | 74.66  | 63.22               | <b>83.15</b>      | 38.36                | 72.67  | 50.21               | 70.06             |
|                        | $t$          | 100       | 54.59              | 76.52  | 63.72               | 81.82             | 39.02                | 73.29  | 50.93               | 69.18             |
|                        | $t$          | 500       | 59.30              | 68.18  | 63.43               | 80.00             | 35.13                | 71.89  | 47.20               | 66.67             |
|                        | $t$          | 1000      | 59.12              | 73.65  | 65.59               | 82.61             | 35.00                | 71.04  | 46.90               | 63.16             |
|                        | $t$          | 5000      | 71.84              | 74.75  | 73.27               | 81.40             | 50.65                | 76.21  | 60.86               | 68.35             |
|                        | $\chi^2 + t$ | 50        | 75.81              | 67.00  | 71.13               | 81.48             | 60.64                | 68.13  | 64.16               | 75.00             |
|                        | $\chi^2 + t$ | 100       | 73.99              | 69.44  | 71.65               | 80.95             | 58.02                | 68.01  | 62.62               | 75.00             |
|                        | $\chi^2 + t$ | 500       | 74.46              | 66.50  | 70.25               | 78.95             | 56.70                | 71.04  | 63.06               | 77.17             |
|                        | $\chi^2 + t$ | 1000      | 77.33              | 66.33  | 71.41               | 77.33             | 76.41                | 66.89  | 71.33               | 77.27             |
|                        | $\chi^2 + t$ | 5000      | 87.44              | 60.35  | 71.41               | 78.48             | 77.37                | 61.39  | 68.46               | 73.60             |
| ngrams+concepts+assert | $\chi^2$     | 50        | 80.10              | 67.42  | 73.22               | 82.61             | 76.46                | 67.06  | 71.45               | 78.99             |
|                        | $\chi^2$     | 100       | 80.58              | 67.42  | 73.42               | 82.93             | 73.78                | 66.95  | 70.20               | 77.97             |
|                        | $\chi^2$     | 500       | 83.28              | 67.09  | 74.31               | 82.05             | 77.07                | 67.34  | 71.88               | 79.34             |
|                        | $\chi^2$     | 1000      | 80.34              | 68.10  | 73.71               | 80.00             | 85.63                | 64.87  | 73.82               | 80.99             |
|                        | $\chi^2$     | 5000      | 83.45              | 61.11  | 70.55               | 74.70             | 86.98                | 64.48  | 74.06               | <b>81.67</b>      |
|                        | $t$          | 50        | 69.72              | 78.87  | 74.01               | 84.09             | 62.16                | 78.90  | 69.54               | 75.00             |
|                        | $t$          | 100       | 71.57              | 78.62  | 74.93               | 83.15             | 63.62                | 79.69  | 70.75               | 75.82             |
|                        | $t$          | 500       | 68.92              | 72.22  | 70.53               | 83.72             | 58.32                | 80.81  | 67.75               | 75.16             |
|                        | $t$          | 1000      | 67.12              | 78.37  | 72.31               | 83.15             | 55.93                | 80.98  | 66.16               | 71.70             |
|                        | $t$          | 5000      | 77.01              | 78.37  | 77.68               | <b>85.71</b>      | 58.39                | 79.69  | 67.39               | 72.73             |
|                        | $\chi^2 + t$ | 50        | 78.53              | 69.28  | 73.61               | 82.35             | 70.49                | 72.39  | 71.43               | 77.86             |
|                        | $\chi^2 + t$ | 100       | 79.93              | 72.39  | 75.97               | 82.98             | 71.23                | 73.91  | 72.54               | 79.22             |
|                        | $\chi^2 + t$ | 500       | 75.05              | 67.09  | 70.84               | 80.52             | 64.50                | 72.50  | 68.27               | 76.92             |
|                        | $\chi^2 + t$ | 1000      | 79.34              | 67.26  | 72.80               | 77.33             | 75.49                | 69.64  | 72.45               | 78.57             |
|                        | $\chi^2 + t$ | 5000      | 86.49              | 61.95  | 72.19               | 77.50             | 79.56                | 65.32  | 71.74               | 75.97             |
